# Supplementary material for: Turn-on fluorescence detection of carbon monoxide in plant tissues based on Cu2+ modulated polydihydroxyphenylalanine nanosensors
Source: Royal Society of Chemistry journal article supplement (doi:10.1039/d4ay01034e), 2024-01-01
Supplement: d4ay01034e1.pdf [file d4ay01034e1.pdf]

## Supporting Information for:

# Turn-On Fluorescence Detection of Carbon Monoxide in Plant Tissues Based on Cu<sup>2+</sup> Modulated Polydihydroxyphenylalanine Nanosensors

Xiqiong Mu,<sup>a, b</sup> Yinquan Wang,<sup>b</sup> Jian Xu<sup>a, \*</sup> and Fankui Zeng<sup>a, c, d, \*</sup>

<sup>a</sup> Research Center for Natural Medicine and Chemical Metrology, Lanzhou Institute of Chemical Physics, Chinese Academy of Sciences, Lanzhou 730000, China.

<sup>b</sup> College of Pharmacy, Gansu University of Chinese Medicine, Lanzhou 730101, China.

<sup>c</sup> Yantai Zhongke Research Institute of Advanced Materials and Green Chemical Engineering, Yantai 264006, China.

<sup>d</sup> Qingdao Center of Resource Chemistry & New Materials, Qingdao 266100, China.

\*Corresponding author, E-mail: xujian1980@licp.cas.cn; zengfk@licp.cas.cn

## Preparation of PDOA nanoparticles

Firstly, 19.9 mL dihydroxyphenylalanine solution (1 mmol/L) was mixed with 0.1 mL NaOH solution (1 mol/L). The above solution was stirred for 3 h at room temperature (25 °C). Then, an HCl solution (1 mol/L) was applied to terminate the polymerization reaction. The pH of the final solution was adjusted to about 7.0. Subsequently, the solution was dialyzed

for 24 h to obtain the purified PDOAs nanoparticles. After dialysis, the as-prepared PDOAs solution (20 mL) was concentrated and freeze-dried to afford the desired PDOAs as a solid powder (0.068 g). Thus, the concentration of the PDOAs matrix solution was determined to be 3.4 mg/mL. In the following experiments, the PDOAs solution was diluted 10 times to 0.34 mg/mL for all the spectrometric analysis and CO detection.

### XPS spectrum of the PDOAs

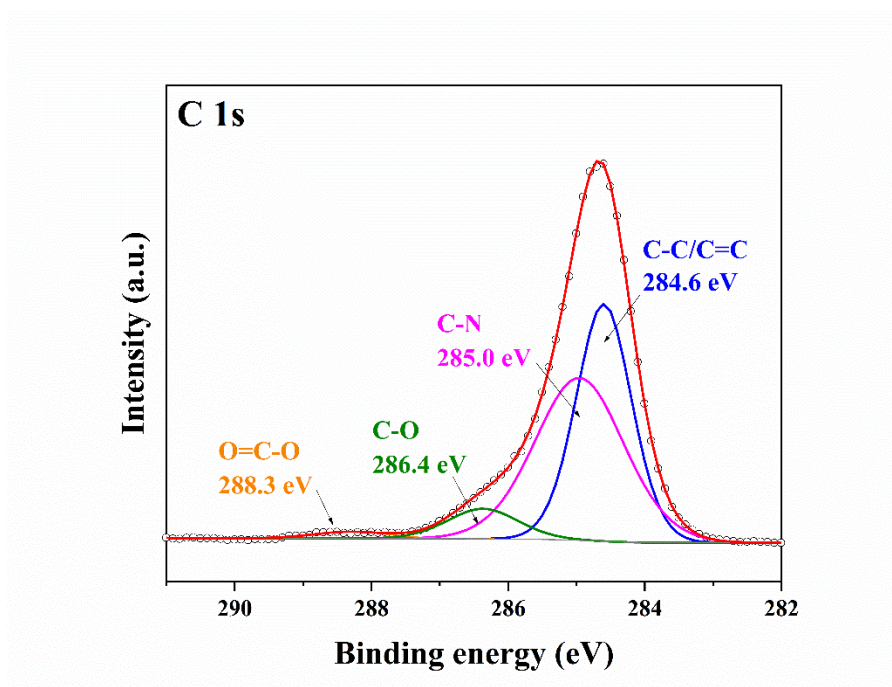

**Figure S1.** The high-resolution C1s spectrum of PDOAs.

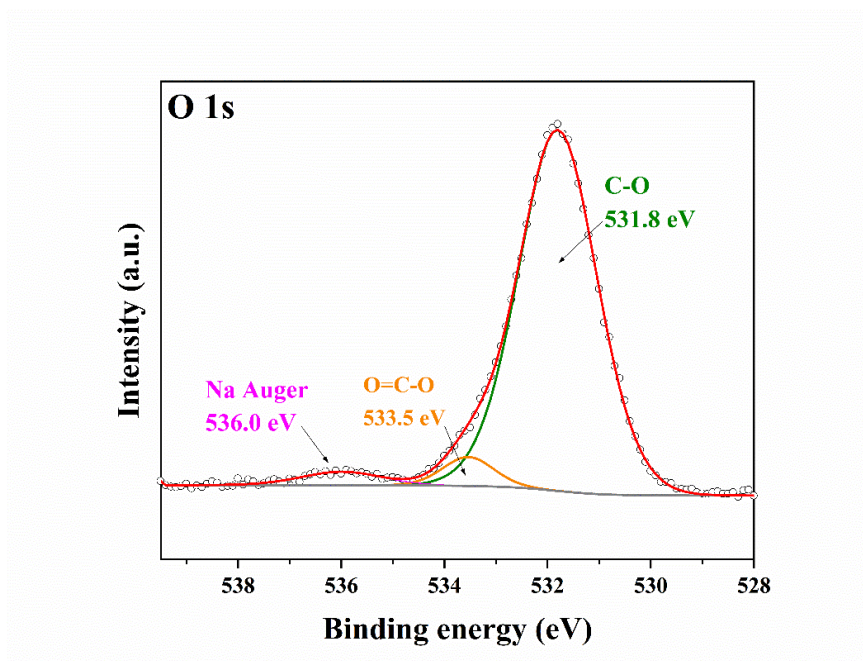

Figure S2. The high-resolution O1s spectrum of PDOAs.

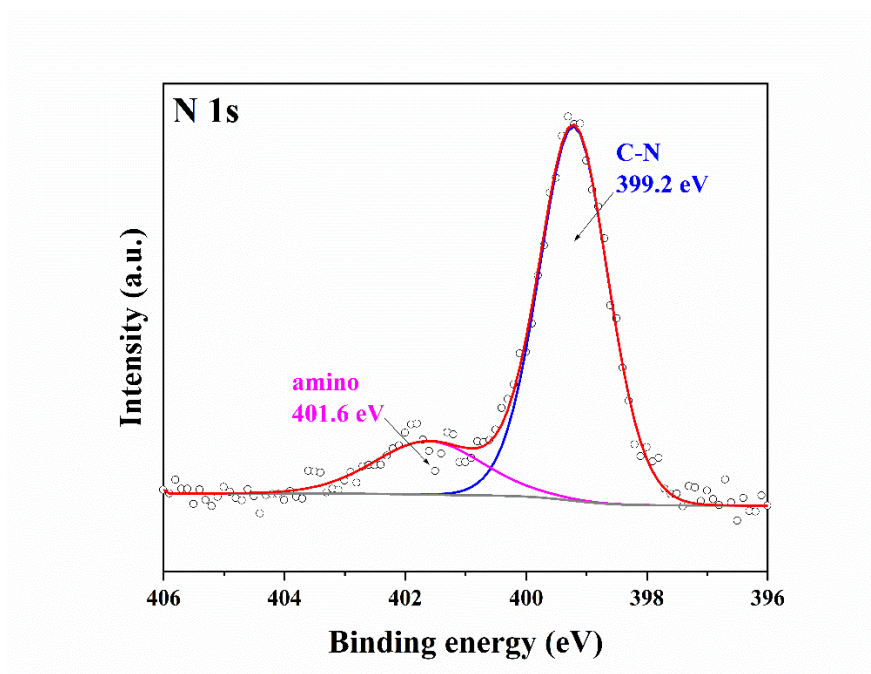

Figure S3. The high-resolution N1s spectrum of PDOAs.

## Excitation-dependent fluorescence of PDOAs

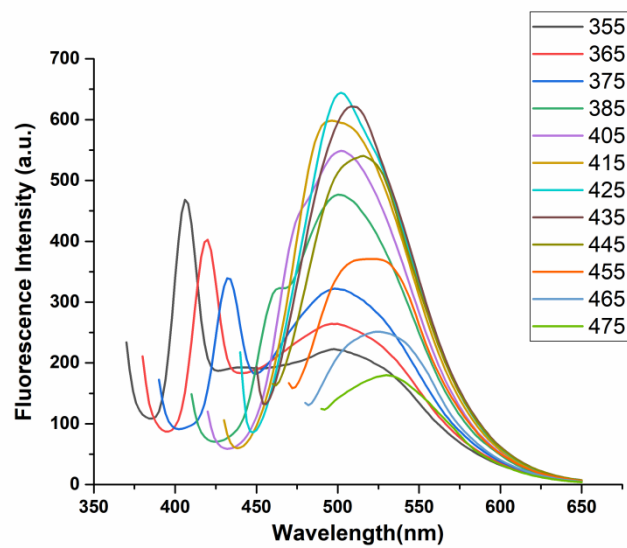

**Figure S4.** The fluorescence emission spectra of 0.34 mg/mL PDOAs with different excitation wavelength.

## Effects of interfering species and pH

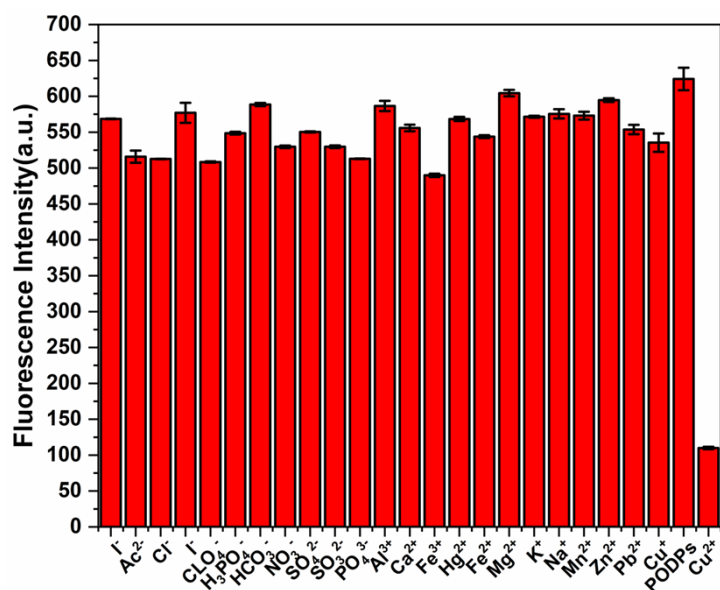

**Figure S5.** Fluorescence intensity response of the PDOAs toward 5.0 μM Cu<sup>2+</sup> and other interferents.

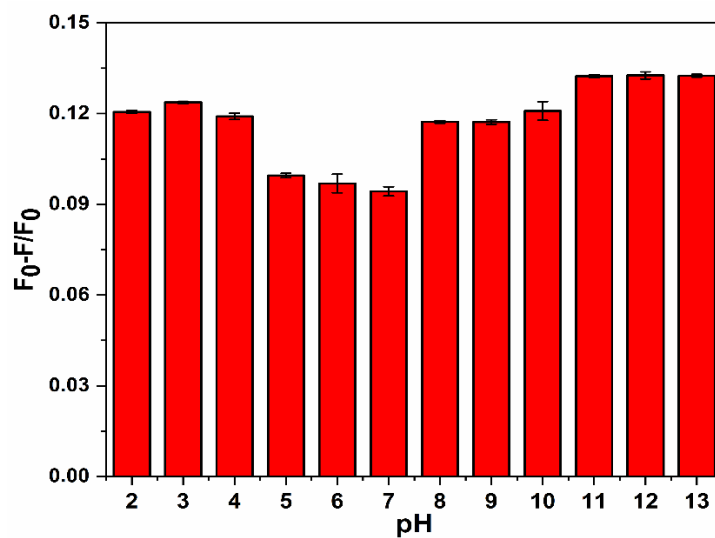

**Figure S6.** The fluorescence intensity ratio histogram of 0.34 mg/mL PDOAs in the presence of 3.6 μM Cu<sup>2+</sup> with different pH values.

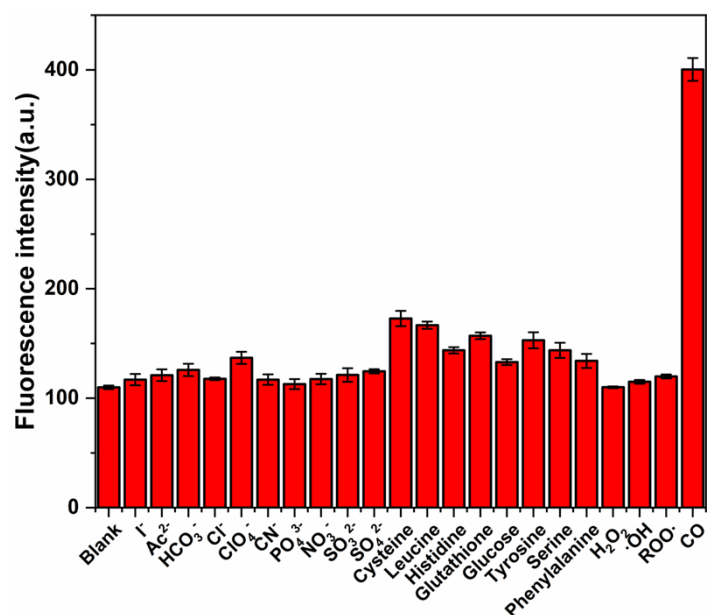

**Figure S7.** Fluorescence intensity response of the PDOAs-Cu<sup>2+</sup> toward 10  $\mu$ M CO and other interfering species.

**Table S1**

Comparison of various CO probes.

| Method/<br>probe                        | Response time<br>(min) | Detection limit<br>( $\mu$ M) | Reference                                  |
|-----------------------------------------|------------------------|-------------------------------|--------------------------------------------|
| Fluorescein derivative/Pd <sup>2+</sup> | 15                     | 0.037                         | <i>Anal. Chem.</i> 2016, 88, 10648.        |
| Borondipyromethene/Pd <sup>2+</sup>     | 20                     | 0.72                          | <i>Anal. Chem.</i> 2016, 88, 11154.        |
| 3-nitro naphthalimide                   | 45                     | 0.60                          | <i>Anal. Chem.</i> 2018, 90, 2933.         |
| Nitronaphthalimide derivative           | 45                     | 0.18                          | <i>Chem. Res. Toxicol.</i> 2020, 33, 651.  |
| CORM3-NIR                               | 20                     | 0.07                          | <i>ACS Sens.</i> 2021, 6, 1312.            |
| BODIPY/Pd <sup>2+</sup>                 | 60                     | 0.5                           | <i>J. Am. Chem. Soc.</i> 2012, 134, 15668. |
| Nitro-quinazolinone derivative          | 30                     | 0.73                          | <i>Molecules.</i> 2023, 28, 3654.          |
| Salicylaldehyde/Cu <sup>2+</sup>        | 2                      | 0.86                          | <i>Anal. Chem.</i> 2022, 94, 11298.        |
| Benzoxadiazole derivative               | 30                     | 0.026                         | <i>Tetrahedron. Lett.</i> 2016, 57, 2927.  |
| PDOAs/Cu <sup>2+</sup>                  | 5                      | 0.072                         | this work                                  |

## Reference

- (1) Qu, Z.; Na, W.; Nie, Y.; Su, X. *Anal. Chim. Acta.* **2018**, *1039*, 74-81.
- (2) Zhang, L.; Zhang, X.; Hu, B.; Shen, L.; Chen, X.; Wang, J. *Analyst* **2012**, *137*, 4974-4980.
